# Supplementary material
Source: Springer Nature journal article supplement (https://www.springermedizin.de/resource/supplementary/40248_2014_174_MOESM4_ESM.pdf/9686266)

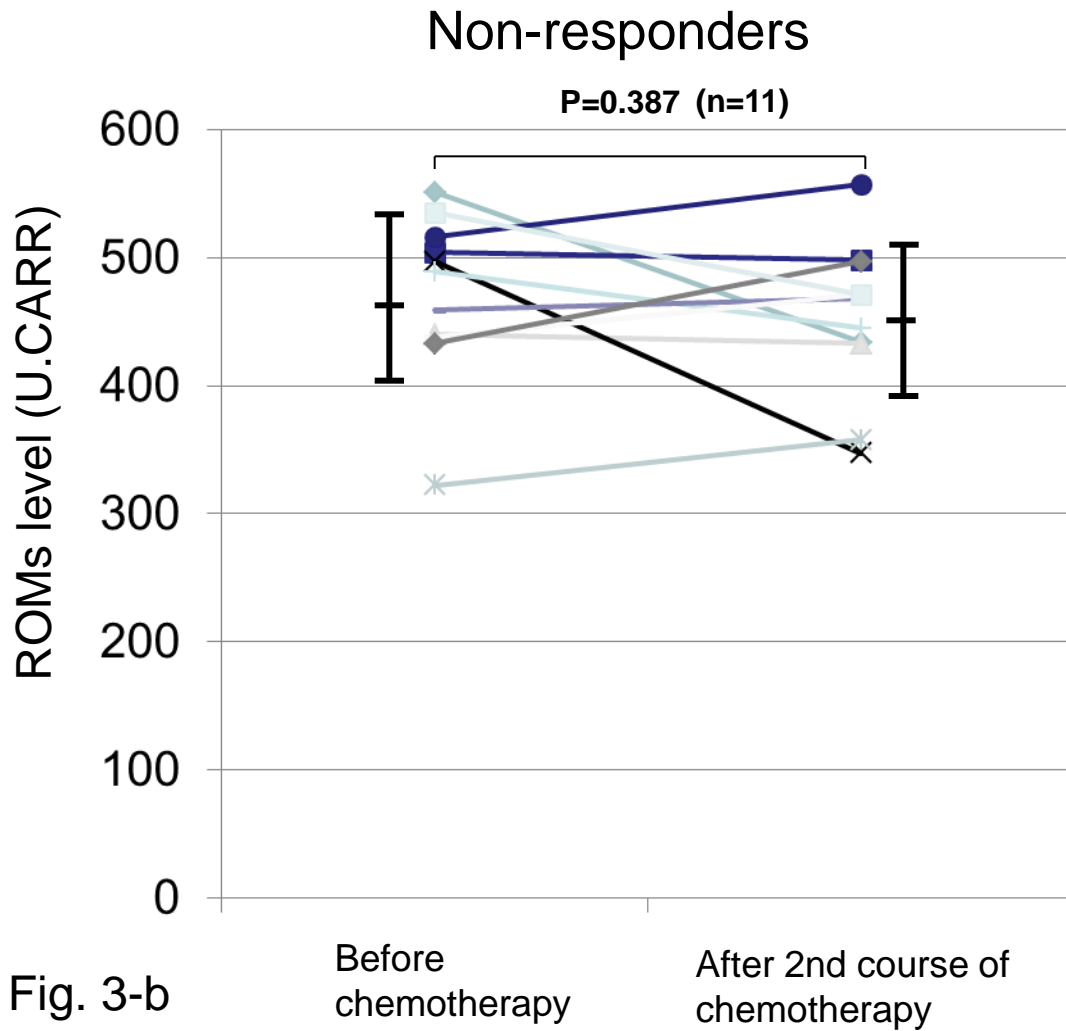

Fig. 3-b

Supplement: MOESM4 [file 9686266]
